# Supplementary material for: High-dimensional genomic data bias correction and data integration using MANCIE
Source: PubMed Central journal article supplement (PMC4833864; doi:10.1038/ncomms11305), 2016-04-13
Supplement: ncomms11305-s1.pdf [file ncomms11305-s1.pdf]

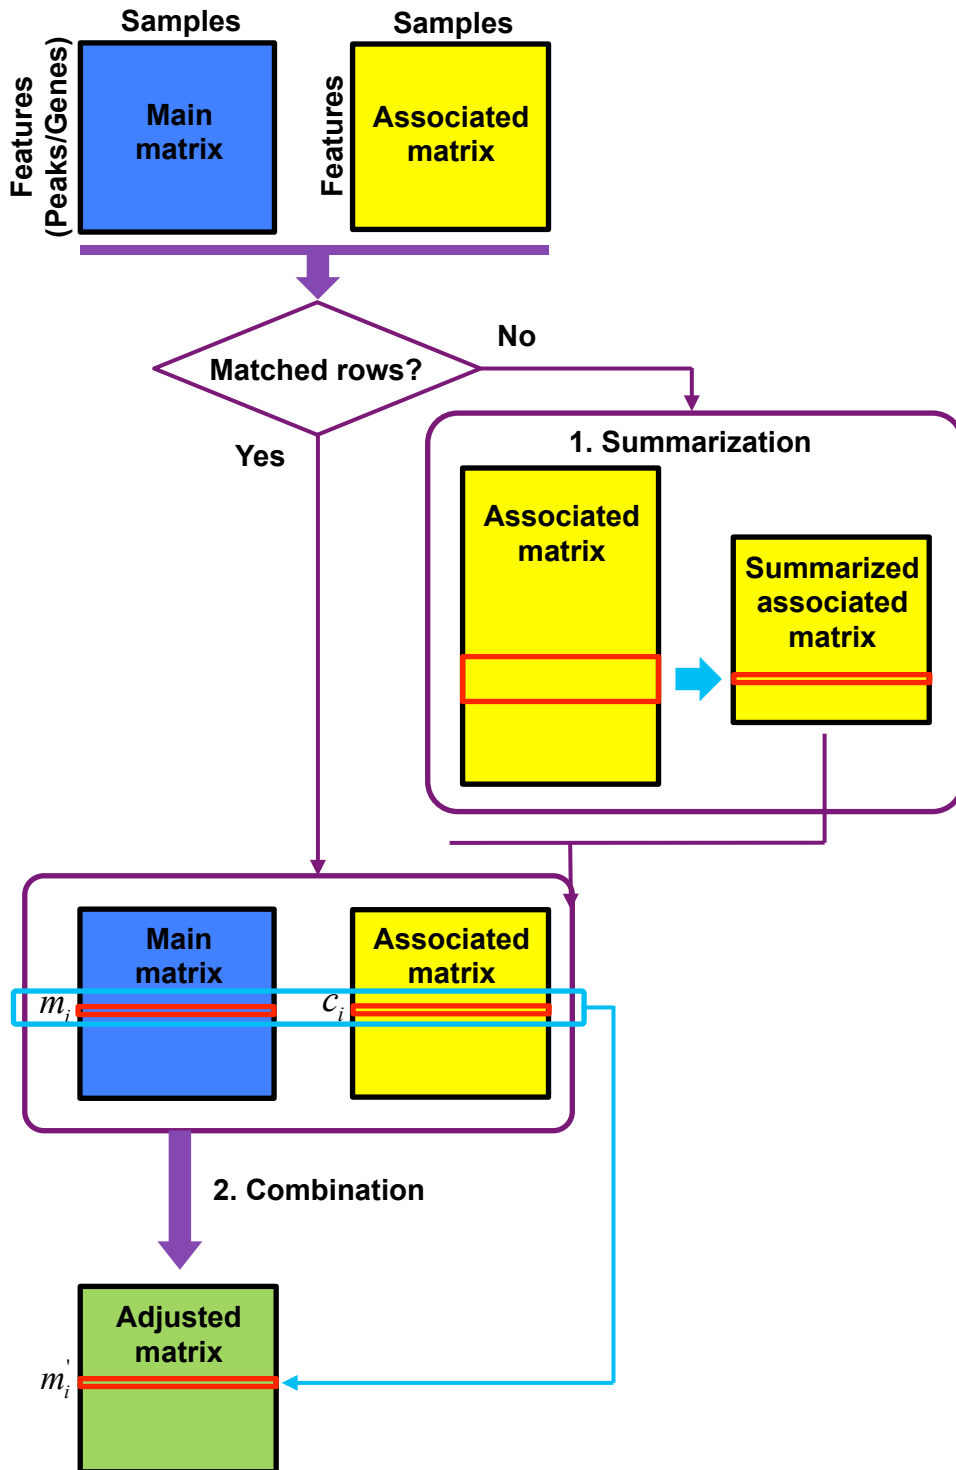

**Supplementary Figure 1.** MANCIE workflow. If the rows in the associated matrix and the main matrix do not match, the summarization step converts the associated matrix to a summarized associated matrix with matched rows. The combination step integrates the main matrix with the summarized associated matrix into the adjusted matrix.

## Supplementary Figure 2

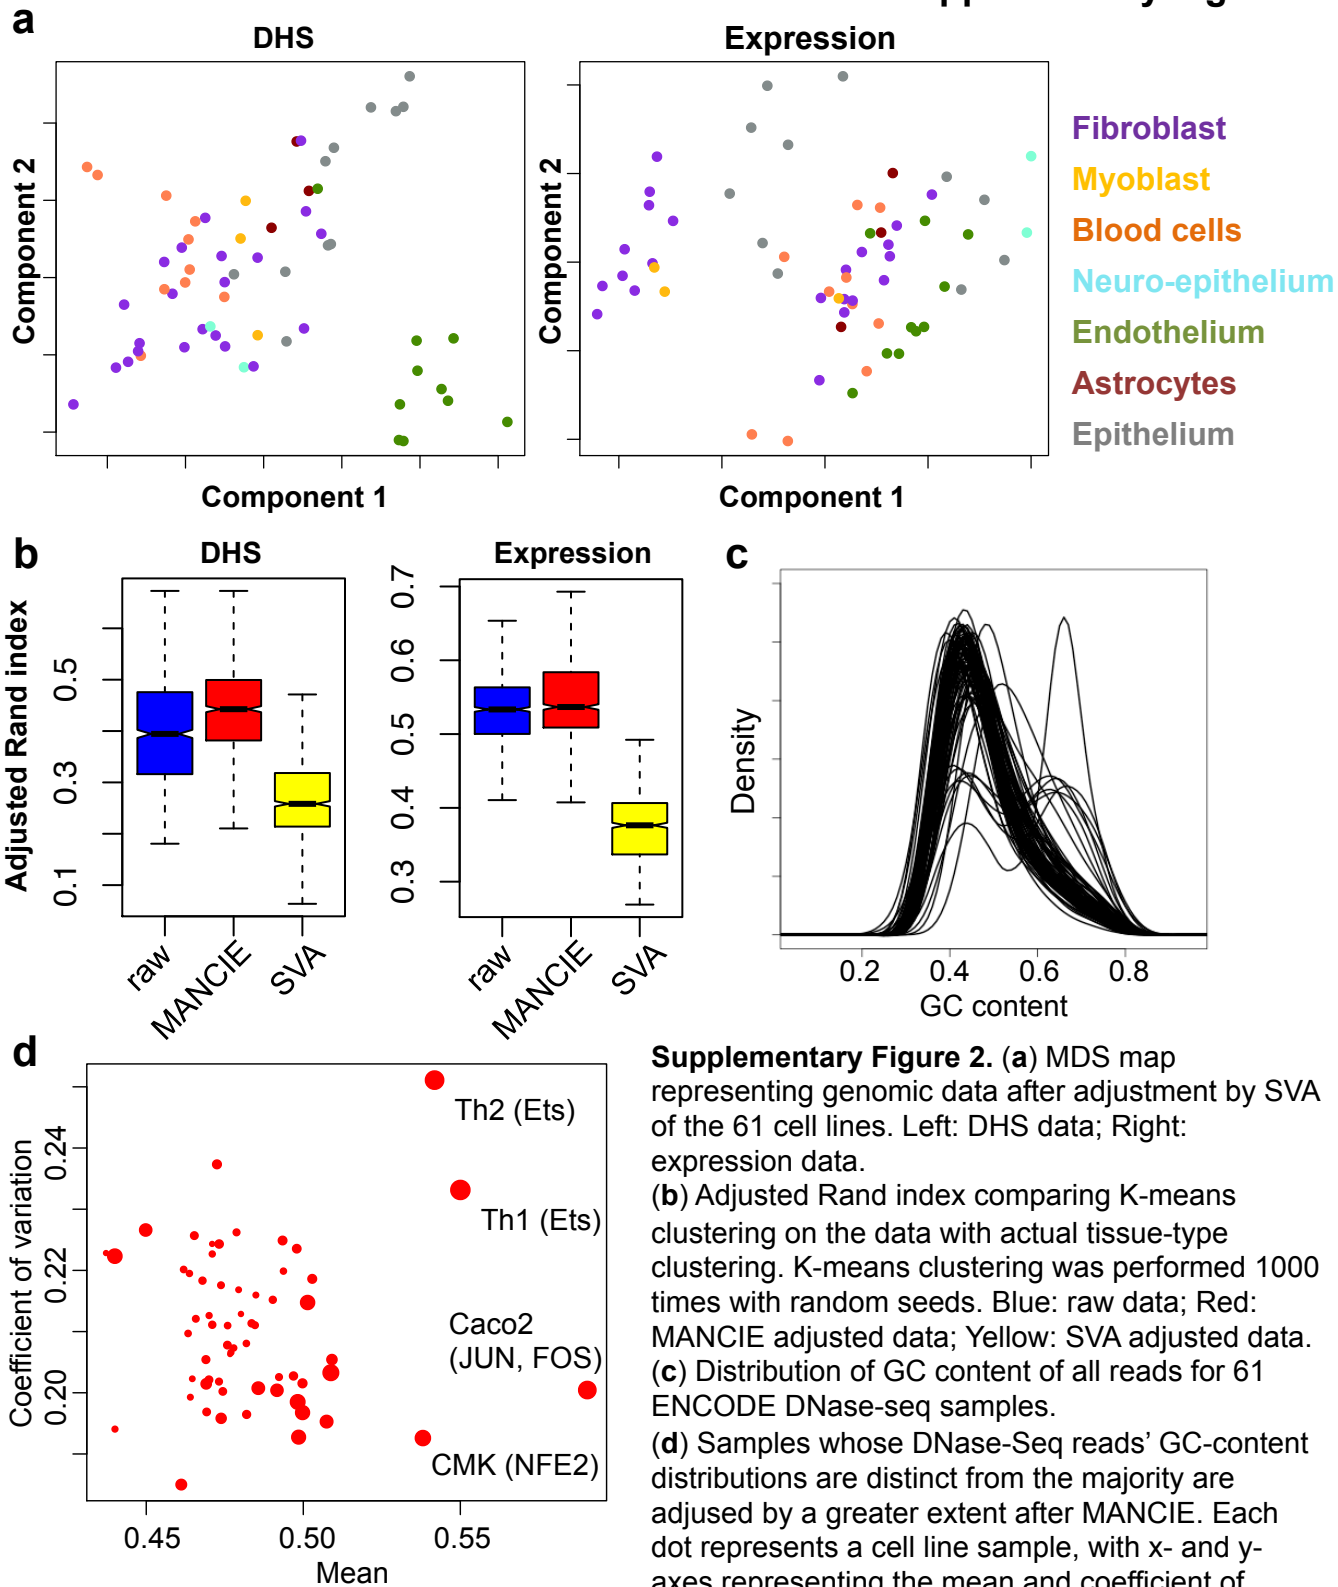

**Supplementary Figure 2.** (a) MDS map representing genomic data after adjustment by SVA of the 61 cell lines. Left: DHS data; Right: expression data.

(b) Adjusted Rand index comparing K-means clustering on the data with actual tissue-type clustering. K-means clustering was performed 1000 times with random seeds. Blue: raw data; Red: MANCIE adjusted data; Yellow: SVA adjusted data.

(c) Distribution of GC content of all reads for 61 ENCODE DNase-seq samples.

(d) Samples whose DNase-Seq reads' GC-content distributions are distinct from the majority are adjusted by a greater extent after MANCIE. Each dot represents a cell line sample, with x- and y-axes representing the mean and coefficient of variation, respectively, of the CG-content distribution of all reads in the DNase-seq dataset. The size of the dot represents the magnitude of adjustment of MANCIE, measured by the Euclidean distance between the sample data vectors before and after MANCIE adjustment.

# Supplementary Figure 3

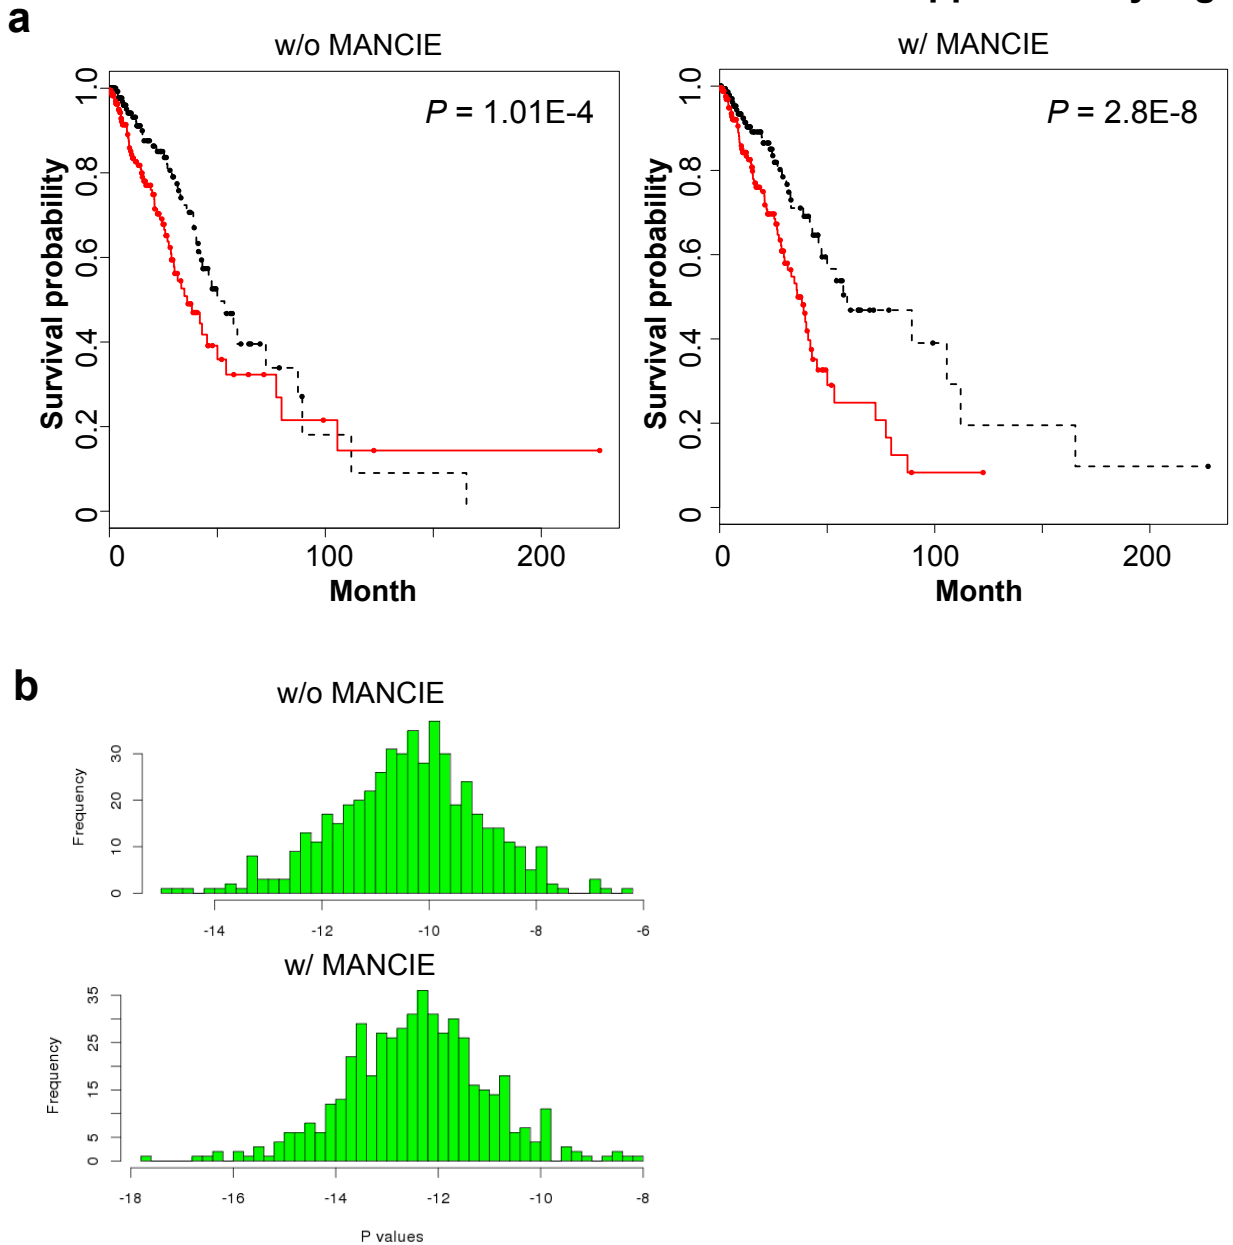

**Supplementary Figure 3. (a)** The Kaplan-Meier plots for an example showing differences in survival prediction accuracy and the improvement in P-value, using the Beer gene signature. Patient samples were separated into two groups according to the trained risk score using the gene signature with the expression data. High-risk group is labeled in red and low-risk group is labeled in black. The high-risk group is better separated from the low-risk group by using the MANCIE-adjusted expression data (right), compared with using the raw data (left).

**(b)** Distribution of P-value scores ( $-\log_{10}P$ value) for the prognostic prediction with the Beer gene signature, comparing raw expression data (top) and MANCIE-adjusted expression data (bottom), from TCGA lung cancer (LUAD) cohort.

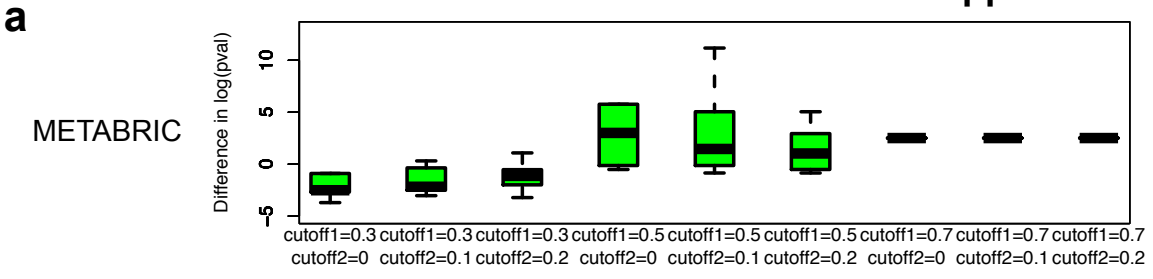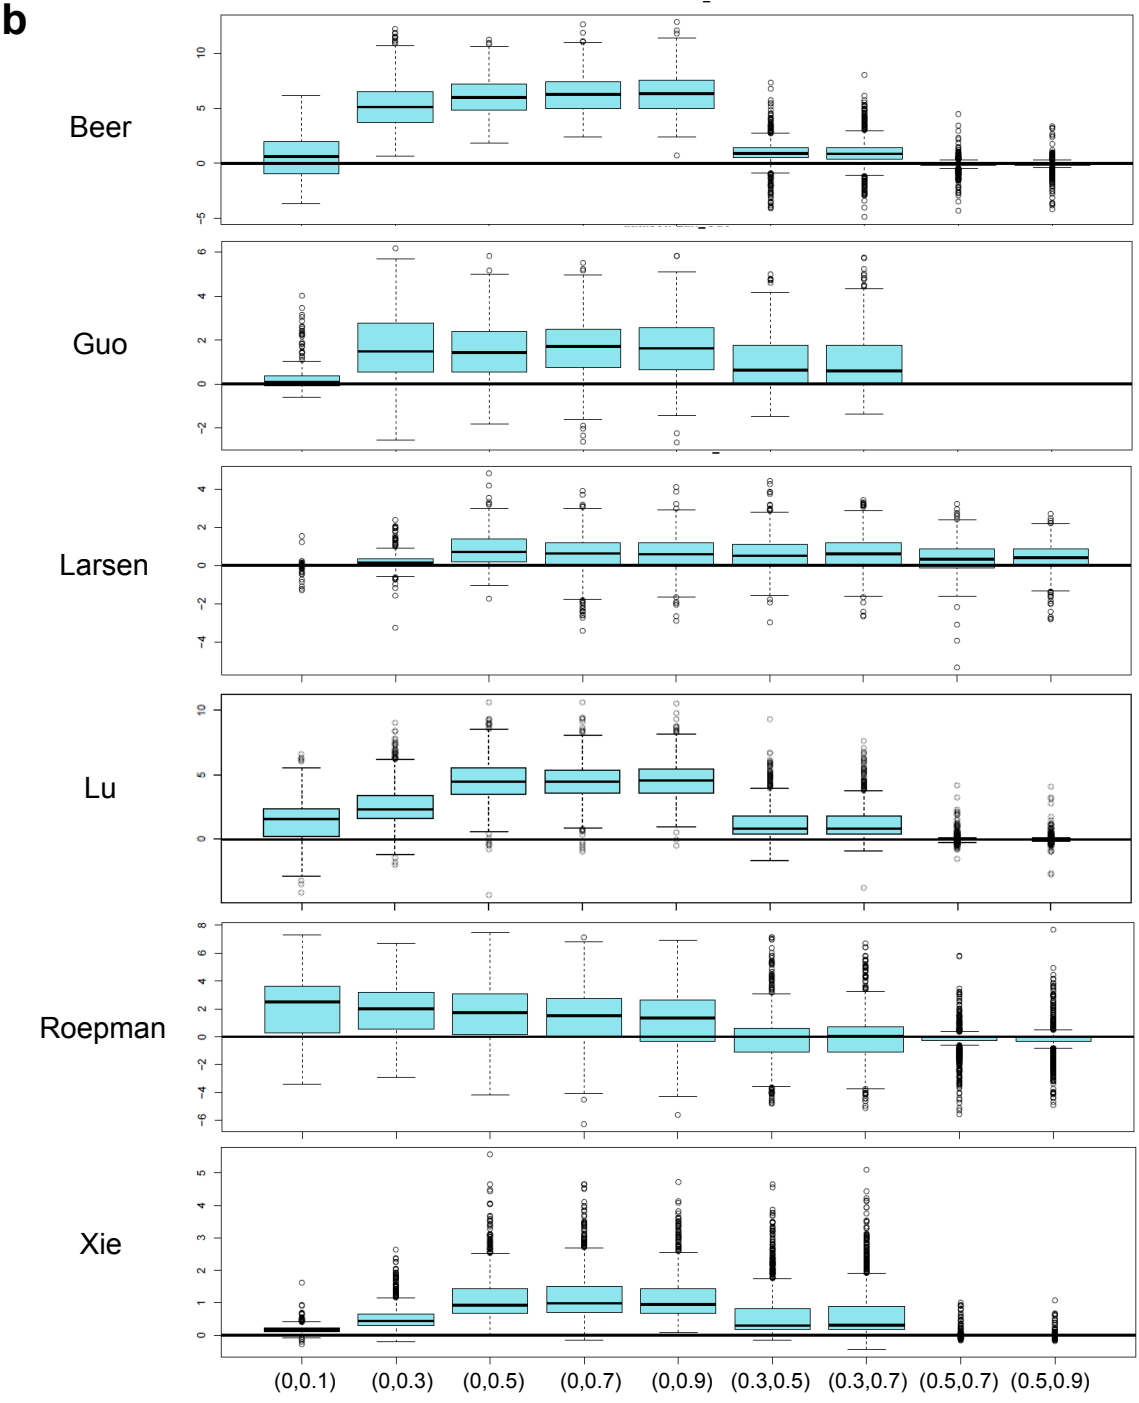

**Supplementary Figure 4.** P-value improvement on the METABRIC data (a) and the 6 gene signatures from TCGA data (b) under combinations of different MANCIE parameters. Y-axis indicates the difference of P-value scores similar to **Fig. 3c**. Each box plot represents a parameter setting, labeled as (cutoff1, cutoff2) at the bottom.

## Supplementary Note 1

### Theoretical Support for MANCIE: an Approximation of Rigorous Statistical Inference

**Problem Description.** Let  $m_i = (m_{i1}, \dots, m_{iK})$  be the  $i$ -th row (i.e., feature) of the main matrix  $M$ , and  $c_i = (c_{i1}, \dots, c_{iK})$  be its counterpart in the associated matrix  $C$ , where each  $k \in \{1, \dots, K\}$  stands for one sample or condition. Since  $(m_{ik}, c_{ik})^T$  are observations of feature  $i$  from different biological experiments which often contain a lot of uncertainty, it's natural to assume that they are the noised version of the underlying “truth”  $(m_{ik}^*, c_{ik}^*)^T$ , i.e.,

$$(m_{ik}, c_{ik})^T = (m_{ik}^*, c_{ik}^*)^T + \varepsilon_{ik},$$

where  $\varepsilon_{ik}$  is a two-dimensional noise vector. MANCIE aims to remove noise in  $m_i$  by borrowing information from  $c_i$ , i.e., inferring  $m_i^* = (m_{i1}^*, \dots, m_{iK}^*)$  based on both  $m_i$  and  $c_i$ .

**Statistical Model & Inference.** To simplify the problem, let's assume that both  $\{(m_{ik}^*, c_{ik}^*)^T\}_{k=1}^K$  and  $\{\varepsilon_{ik}\}_{k=1}^K$  are i.i.d. samples of Gaussian distributions, i.e.,

$$(m_{ik}^*, c_{ik}^*)^T \sim N(\mu_i, \Sigma_i) \quad \text{and} \quad \varepsilon_{ik} \sim N(\mathbf{0}, \Delta_i),$$

where  $\Sigma_i = \begin{pmatrix} 1 & \rho_i \\ \rho_i & 1 \end{pmatrix}$ ,  $\Delta_i = \begin{pmatrix} \delta_{im}^2 & 0 \\ 0 & \delta_{ic}^2 \end{pmatrix}$ ,  $\{(m_{ik}^*, c_{ik}^*)^T\}_{k=1}^K$  and  $\{\varepsilon_{ik}\}_{k=1}^K$  are independent of each other, and  $\rho_i > 0$ . Clearly,  $\delta_{im}^2$  and  $\delta_{ic}^2$  stands for the noise-signal ratio of  $m_i$  and  $c_i$  respectively, where a larger  $\delta^2$  means lower quality of the data. Here, we assume that  $\delta_{ic}^2 \geq \delta_{im}^2$  as the main matrix usually enjoys better quality.

Under this model, we have

$$\begin{aligned} (m_{ik}, c_{ik})^T \mid (m_{ik}^*, c_{ik}^*)^T &\sim N((m_{ik}^*, c_{ik}^*)^T, \Delta_i), \\ (m_{ik}, c_{ik})^T &\sim N(\mu_i, \Sigma_i + \Delta_i). \end{aligned}$$

And, it's easy to check that

$$\tilde{\rho}_i = \text{cor}(m_i, c_i) = \frac{\rho_i}{\sqrt{(1 + \delta_{im}^2)(1 + \delta_{ic}^2)}} \leq \rho_i = \text{cor}(m_i^*, c_i^*),$$

i.e., the correlation coefficient of the observed data  $(m_i, c_i)$  is always smaller than the true correlation coefficient  $\text{cov}(c_i^*, m_i^*)$ , and the difference depends on the noise level  $(\delta_{im}^2, \delta_{ic}^2)$ .

Without loss of generality, we can also assume that  $\mu_i = \mathbf{0}$  for any feature  $i$  (i.e., the observed data are centralized).

Now, assume that both  $\Sigma_i$  and  $\Delta_i$  are known. Based on the Bayes rule, we have the following posterior distribution for  $(m_{ik}^*, c_{ik}^*)^T$ :

$$\begin{aligned}
& f((m_{ik}^*, c_{ik}^*)^T \mid (m_{ik}, c_{ik})^T) \\
& \propto \pi((m_{ik}^*, c_{ik}^*)^T) \cdot f((m_{ik}, c_{ik})^T \mid (m_{ik}^*, c_{ik}^*)^T) \\
& \propto \exp \left\{ -\frac{1}{2} (m_{ik}^*, c_{ik}^*) \Sigma_i^{-1} (m_{ik}^*, c_{ik}^*)^T \right\} \times \\
& \quad \exp \left\{ -\frac{1}{2} [(m_{ik}, c_{ik}) - (m_{ik}^*, c_{ik}^*)] \Delta_i^{-1} [(m_{ik}, c_{ik}) - (m_{ik}^*, c_{ik}^*)]^T \right\} \\
& \sim N((\Sigma_i^{-1} + \Delta_i^{-1})^{-1} \Delta_i^{-1} (m_{ik}, c_{ik})^T, (\Sigma_i^{-1} + \Delta_i^{-1})^{-1}),
\end{aligned}$$

which means that the best guess for the unknown  $(m_{ik}^*, c_{ik}^*)^T$  should be the posterior mean

$$\begin{aligned}
\nu_{ik} &= (\Sigma_i^{-1} + \Delta_i^{-1})^{-1} \Delta_i^{-1} (m_{ik}, c_{ik})^T \\
&\propto \begin{pmatrix} \delta_{ic}^2 + 1 - \rho_i^2 & \rho_i \delta_{im}^2 \\ \rho_i \delta_{ic}^2 & \delta_{im}^2 + 1 - \rho_i^2 \end{pmatrix} \begin{pmatrix} m_{ik} \\ c_{ik} \end{pmatrix}.
\end{aligned}$$

Since we are interested in improving the main matrix, we will only focus on

$$E(m_{ik}^* \mid m_{ik}, c_{ik}) \propto m_{ik} + \frac{\rho_i \delta_{im}^2}{\delta_{ic}^2 + (1 - \rho_i^2)} \cdot c_{ik}.$$

**MANCIE as an Approximation of Rigorous Statistical Inference.** In practice, however, we can only estimate  $(\Sigma_i + \Delta_i)$  from the observed data  $m_i$  and  $c_i$ , and neither  $\Sigma_i$  or  $\Delta_i$  is estimable on their own. Therefore,  $h(\rho_i) = \frac{\rho_i \delta_{im}^2}{\delta_{ic}^2 + (1 - \rho_i^2)}$ , and thus  $E(m_{ik}^* \mid m_{ik}, c_{ik})$ , cannot be precisely known. Fortunately, the following facts hold for  $h(\rho_i)$ :

$$\begin{aligned}
(F_1) \quad & h(\rho_i) \approx 0 \text{ if } \rho_i \text{ is very close to } 0, \\
(F_2) \quad & h(\rho_i) \approx \frac{\rho_i \delta_{im}^2}{\delta_{ic}^2 + 1} \text{ if } \rho_i \text{ is close to } 0, \\
(F_3) \quad & h(\rho_i) \approx \frac{\delta_{im}^2}{\delta_{ic}^2} \text{ if } \rho_i \text{ is very close to } 1,
\end{aligned}$$

which correspond to the three scenarios (a), (b) and (c) in the subsection of ‘‘Removing noise in matrix’’ respectively under proper conditions.

Clearly,  $(F_1)$  matches to scenarios (a). Let  $\tilde{m}_i = \frac{m_i}{\sqrt{\delta_{im}^2 + 1}}$  and  $\tilde{c}_i = \frac{c_i}{\sqrt{\delta_{ic}^2 + 1}}$  be the rescaled data (i.e., “scale( $m_i$ )” and “scale( $c_i$ )” in the paper). The new vector  $m'$  defined in scenarios (b) is:

$$m'_i = \tilde{m}_i + \tilde{\rho}_i \cdot \tilde{c}_i = \frac{m_i}{\sqrt{\delta_{im}^2 + 1}} + \frac{\rho_i}{\sqrt{(\delta_{im}^2 + 1)(\delta_{ic}^2 + 1)}} \cdot \frac{c_i}{\sqrt{\delta_{ic}^2 + 1}} \propto m_i + \frac{\rho_i}{\delta_{ic}^2 + 1} \cdot c_i,$$

which matches to  $(F_2)$  when  $\delta_{im}^2$  is close to 1. For scenarios (c), because  $cor(m_i, c_i) = \Sigma_i + \Delta_i$ , the first principle component of  $cor(m_i, c_i)$  is  $(1, \frac{r_i + \sqrt{r_i^2 + 4}}{2})$ , where  $r_i = \frac{\delta_{ic}^2 - \delta_{im}^2}{\rho_i}$ . Thus, the new vector  $m'$  defined in this scenario is

$$m'_i \propto m_i + \frac{r_i + \sqrt{r_i^2 + 4}}{2} c_i,$$

which degenerates to  $(m_i + c_i)$  when  $r_i$  is close to 0 (this happens when  $\delta_{im}^2 \approx \delta_{ic}^2$  and the difference  $\delta_{ic}^2 - \delta_{im}^2$  is small compared to  $\rho_i$ ). Considering that  $h(\rho_i)$  also degenerates to 1 when  $\delta_{im}^2 \approx \delta_{ic}^2$  in  $(F_3)$ , we find that  $(F_3)$  matches to scenarios (c) when  $\delta_{im}^2$  and  $\delta_{ic}^2$  are close to each other. Summarizing all three cases, we conclude that MANCIE is a proper approximation of rigorous statistical inference when the noise-signal ratio in both the main matrix and association matrix are close to 1.
